# Supplementary material
Source: PubMed Central journal article supplement (PMC4840550)
Supplement: cdcb0ae7f1fbda476379e685de56b643_brain-2015-00612-File009.pdf [file cdcb0ae7f1fbda476379e685de56b643_brain-2015-00612-File009.pdf]

## Supplementary Materials for

### TRPV1 on astrocytes rescues nigral dopamine neurons in the Parkinson's disease via CNTF

Jin H. Nam<sup>1\*</sup>, Eun S. Park<sup>1,16\*</sup>, So-Yoon Won<sup>2\*</sup>, Yu A. Lee<sup>1\*</sup>, Kyoung I. Kim<sup>1\*</sup>, Jae Y. Jeong<sup>1\*</sup>, Jeong Y. Baek<sup>1\*</sup>, Eun J. Cho<sup>1</sup>, Minyoung Jin<sup>1</sup>, Young C. Chung<sup>1,17</sup>, Byoung D. Lee<sup>1</sup>, Sung Hyun Kim<sup>1</sup>, Eung-Gook Kim<sup>2</sup>, Kyunghee Byun<sup>3</sup>, Bonghee Lee<sup>3</sup>, Dong Ho Woo<sup>4,18</sup>, C. Justin Lee<sup>4</sup>, Sang R. Kim<sup>5</sup>, Eugene Bok<sup>1,6</sup>, Yoon-Seong Kim<sup>6</sup>, Tae-Beom Ahn<sup>7</sup>, Hyuk Wan Ko<sup>1</sup>, Saurav Brahmachari<sup>8,9,13</sup>, Olga Pletinkova<sup>10</sup>, Juan C. Troconso<sup>9,10</sup>, Valina L. Dawson<sup>8,9,11,12,14</sup>, Ted M. Dawson<sup>8,9,11,13,14,15</sup>, and Byung K. Jin<sup>1\*\*</sup>

\*These authors contributed equally to this work.

\*\*Correspondence: [bkjin@khu.ac.kr](mailto:bkjin@khu.ac.kr)

**This PDF file includes:**

**Supplementary Figure and legends**

Supplementary Figs 1-4

Supplementary Tables 1-3

## Supplementary Figure and legends

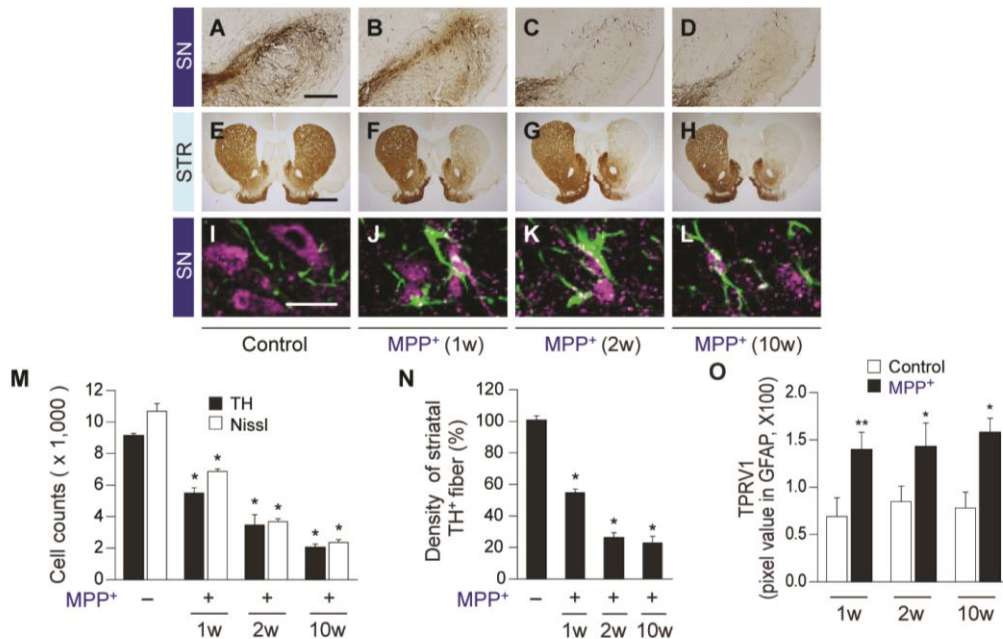

### Supplementary Figure 1. Degeneration of Dopamine neurons and expression of astrocytic TRPV1 in MPP<sup>+</sup>-lesioned rat SNpc *in vivo*.

(A-L) Photomicrographs of TH<sup>+</sup> cells in the substantia nigra (SN) (A-D), TH<sup>+</sup> fibers in the striatum (STR) (E-H) or colocalized cells of GFAP (green) and TRPV1 (red) (I-L) in the rat substantia nigra pars compacta (SNpc) at 1 (B, F, J), 2 (C, G, K) and 10 (D, H, L) weeks after a unilateral MFB injection of MPP<sup>+</sup> or at 2 weeks after injection of PBS as a control (A, E, I). (M) Number of TH<sup>+</sup> and Nissl<sup>+</sup> cells in the SNpc, \* $P < 0.01$ , significantly different from control. (N) Optical density of TH<sup>+</sup> fibers in the STR \* $P < 0.01$ , significantly different from control. Note no differences of remaining TH<sup>+</sup> cells in the SNpc and TH<sup>+</sup> fibers in the STR between 2 and 10 weeks post MPP<sup>+</sup>, indicating that degeneration of nigrostriatal dopamine neurons was complete at 2 weeks post MPP<sup>+</sup> and sustained up to 10 weeks post MPP<sup>+</sup>. (O) Quantification of TRPV1 expression colocalized with GFAP<sup>+</sup> astrocytes in the SNpc of MPP<sup>+</sup>-lesioned rat brain at

indicated time point  $*P < 0.05$ ,  $**P < 0.01$ , significantly different from control. Scale bars: 400  $\mu\text{m}$  (A-D, SN), 2 mm (E-H, STR), 20  $\mu\text{m}$  (I-L). Mean  $\pm$  s.e.m.; M-O,  $n = 5$  to 10 in each group; ANOVA and Student-Newman-Keuls analysis.

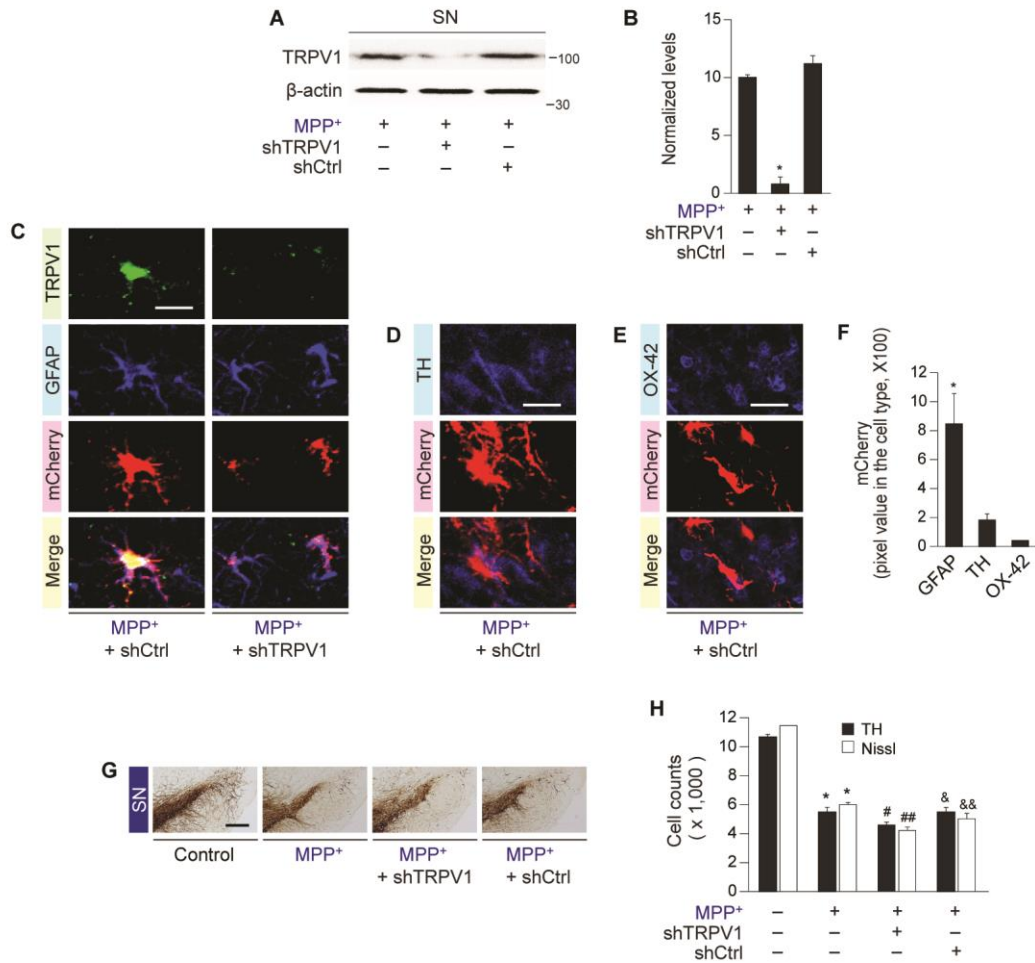

## Supplementary Figure 2. Efficiency and specificity of TRPV1 knockdown.

Rats were given a unilateral medial forebrain bundle (MFB) injection of MPP<sup>+</sup> followed by injection of shTRPV1 or shCtrl (control) into the substantia nigra (SN) (See Fig. 1A). At 1 week post MPP<sup>+</sup>, brain tissues were prepared for Western blot (A and B;  $*P < 0.001$ , significantly different from MPP<sup>+</sup>) or immunohistochemical analysis (C-H). shTRPV1 reduced TRPV1 protein levels (A and B) or TRPV1 immunoreactivity (green, C) within GFAP<sup>+</sup> astrocytes (blue, C) in the substantia nigra pars compacta (SNpc), compared to shCtrl (A-C). The viruses

transduced the fluorescent mCherry protein (red, **A-E**), indicating infected cells. mCherry<sup>+</sup> cells were mainly colocalized within GFAP<sup>+</sup> astrocytes (**C** and **F**) whereas there was minimal mCherry<sup>+</sup> cells colocalized in TH<sup>+</sup> neurons (**D** and **F**) or OX-42<sup>+</sup> microglia (**E** and **F**) in the SNpc of MPP<sup>+</sup>-lesioned rats, ;\* $P < 0.001$ , significantly different from mCherry cells colocalized in TH<sup>+</sup> or OX-42<sup>+</sup> cells. Photomicrographs of TH<sup>+</sup> cells in the SNpc (**G**) and number of TH<sup>+</sup> or Nissl<sup>+</sup> cells in the SNpc (**H**) \* $P < 0.01$ , significantly different from control, # $P < 0.05$ , ## $P < 0.01$ , significantly different from MPP<sup>+</sup>, & $P < 0.05$ , && $P < 0.01$ , significantly different from MPP<sup>+</sup> + shTRPV1. Note that TRPV1 knockdown enhances MPP<sup>+</sup> neurotoxicity in the SNpc *in vivo*. Scale bars; C-E 20  $\mu\text{m}$ . g, 400  $\mu\text{m}$ . Mean  $\pm$  s.e.m.; B,  $n = 4$ ; F and H,  $n = 5$ . ANOVA and Student-Newman-Keuls analysis.

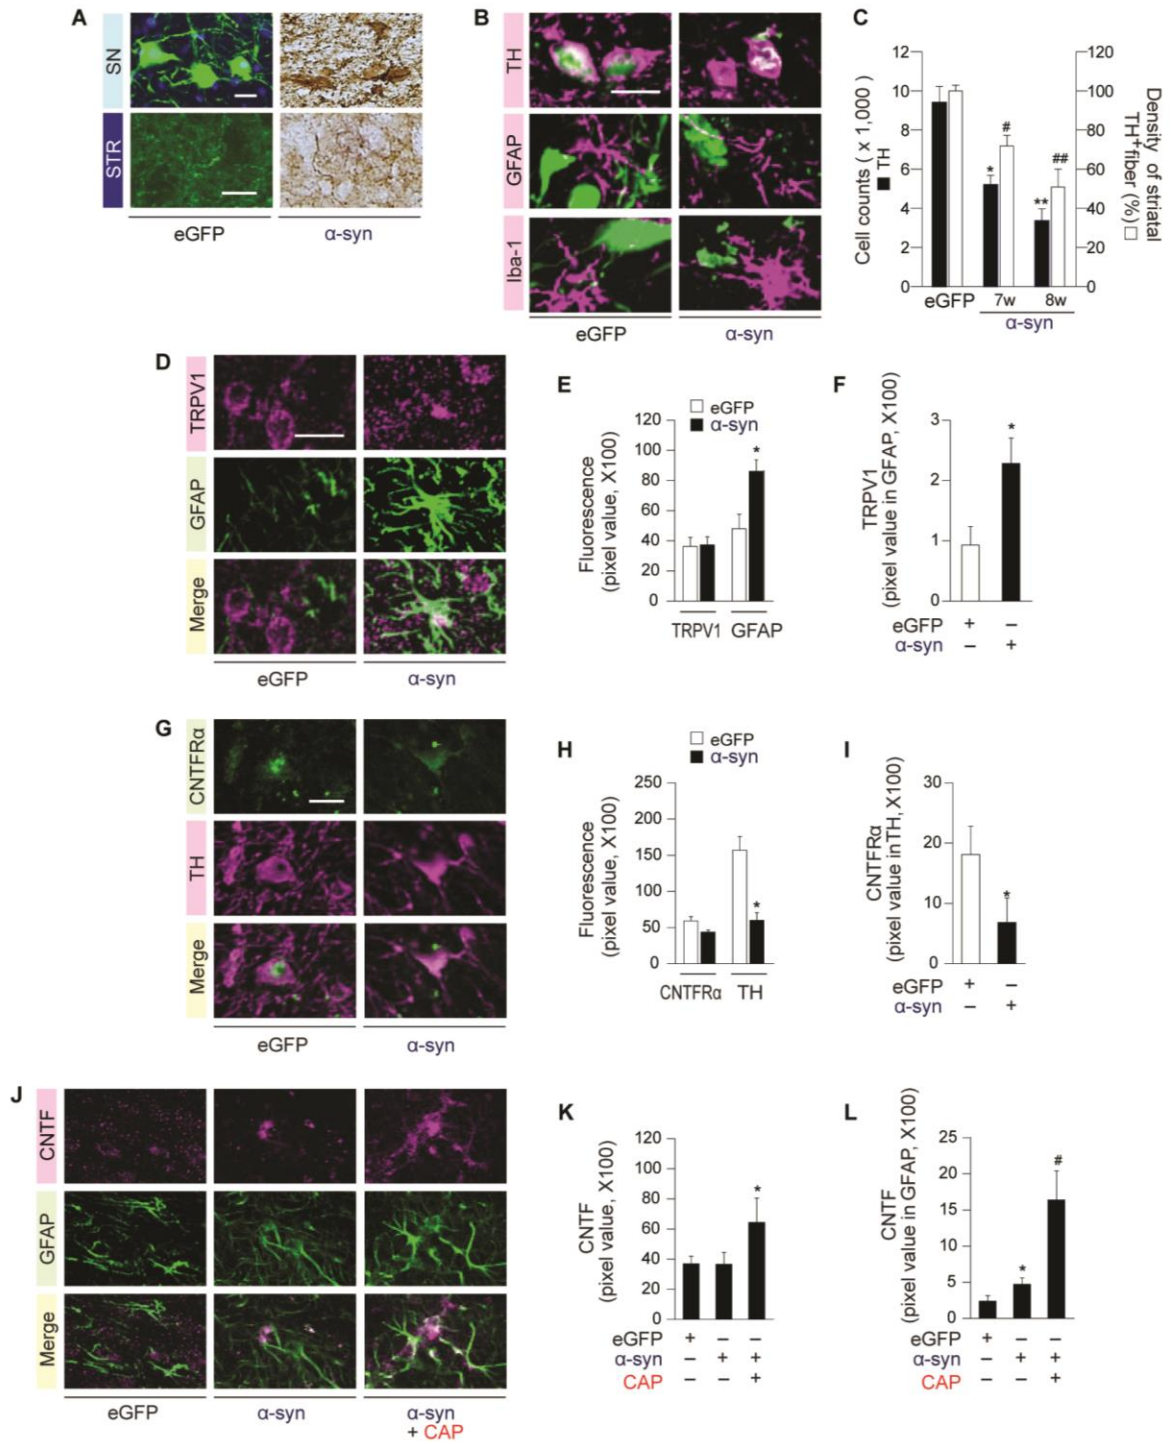

**Supplementary Figure 3. Expression of TRPV1, CNTFR $\alpha$  and CNTF in  $\alpha$ -synuclein-lesioned rat brain.**

(A-L) Rats were given a unilateral injection of AAV2- $\alpha$ -synuclein ( $\alpha$ -syn) or AAV2-eGFP (eGFP, control) into the substantia nigra (SN) and transcardially perfused for immunohistochemical analysis at 7 weeks after transduction (See **Fig. 6A**). Photomicrographs of eGFP<sup>+</sup> or  $\alpha$ -syn<sup>+</sup> cells in the SN and fibers in the striatum (STR) (**A**). Fluorescence images showing colocalization of eGFP<sup>+</sup> (green) or  $\alpha$ -syn<sup>+</sup> (green) cells in TH<sup>+</sup> (dopamine neurons; red) cells, but not in GFAP<sup>+</sup> (astrocytes; red) or Iba-1<sup>+</sup> (microglia; red) cells, respectively (**B**). (**C**) Number of TH<sup>+</sup> cells in the SNpc and optical density of TH<sup>+</sup> fibers in the STR, \* $P < 0.001$ , # $P < 0.01$ , significantly different from control, \*\* $P < 0.05$ , ## $P < 0.05$  significantly different from 7 weeks post  $\alpha$ -syn. Fluorescence images of TRPV1 (red) and GFAP (green), and both images are merged in the substantia nigra pars compacta (SNpc) (**D**), and quantification of TRPV1 and GFAP expression (**E**; \* $P < 0.01$ , significantly different from eGFP), and TRPV1 expression colocalized in GFAP<sup>+</sup> astrocytes (**F**; \* $P < 0.05$ , significantly different from eGFP) in the SNpc. Fluorescence images of CNTFR $\alpha$  (green) and TH (red), and both images are merged in the SNpc (**G**), and quantification of CNTFR $\alpha$  or TH expression (**H**; \* $P < 0.001$ , significantly different from eGFP) and CNTFR $\alpha$  expression colocalized in TH<sup>+</sup> dopamine neurons (**I**; \* $P < 0.01$ , significantly different from eGFP) in the SNpc. Sections adjacent to those used in **Fig. 3** were immunostained. Fluorescence images of CNTF (red) and GFAP (green), and both images are merged in the SNpc at 8 weeks post  $\alpha$ -syn (**J**), and quantification of CNTF expression (**K**; \* $P < 0.05$ , significantly different from  $\alpha$ -syn + CAP) or CNTF expression colocalized with GFAP<sup>+</sup> astrocytes (**L**; \* $P < 0.05$ , significantly different from eGFP, # $P < 0.01$ , significantly different from  $\alpha$ -syn) in the SNpc at 8 weeks post  $\alpha$ -syn. Fluorescence images of GFAP (eGFP, **D** and **J**) and CNTFR $\alpha$  (eGFP, **G**) were pseudo-colored from blue to green. Scale bars; 20  $\mu$ m. Mean  $\pm$  s.e.m.; C,  $n = 4$  to 7 in each group; E, F,  $n = 4$  to 14 in each group; H, I,  $n = 6$  in each group; K, L,  $n = 4$  to 6 in each group. ANOVA and Student-Newman-Keuls analysis.

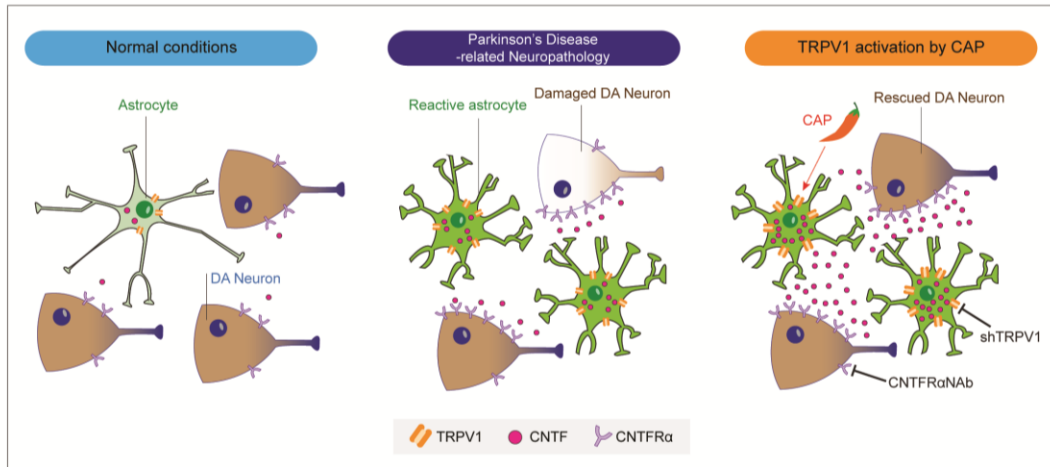

**Supplementary Figure 4. Model of TRPV1-mediated CNTF production in astrocytes and neuroprotection of nigral dopamine neurons of Parkinson's disease.**

There is a dramatic expression of TRPV1 and CNTF in reactive astrocytes in the substantia nigra pars compacta of human Parkinson's disease and Parkinson's disease-related neuropathology (MPP<sup>+</sup>- or  $\alpha$ -synuclein-lesioned rats), compared to the respective controls. Note that astrocytic TRPV1 activation by CAP significantly increases CNTF production and rescues dopamine neurons through over-expressed CNTF receptor alpha on DA neurons in the SNpc of Parkinson's disease *in vivo*. TRPV1, Transient Receptor Potential Vanilloid 1. shTRPV1, TRPV1 shRNA lentivirus. DA, Dopamine. CNTF, Ciliary Neurotrophic Factor. CNTFR $\alpha$ , CNTF receptor alpha. CNTFR $\alpha$ NAb, CNTF receptor alpha neutralizing antibody. CAP, capsaicin.

### Supplementary Tables 1-3

**Supplementary Table 1.** Human postmortem tissues used for Western blots in Fig. 7 A-D.

| Sample No | Final Diagnosis | Age | Sex | Race | PMD  | Tissue |
|-----------|-----------------|-----|-----|------|------|--------|
| 1         |                 | 73  | M   | W    | 9    |        |
| 2         | Control         | 62  | M   | W    | 14   | SN     |
| 3         |                 | 68  | M   | W    | 14   |        |
| 4         |                 | 66  | M   | W    | 10   |        |
| 1         | PD W/D          | 83  | M   | W    | 16.5 |        |
| 2         | PD W/D          | 75  | M   | W    | 6    |        |
| 3         | PD              | 76  | M   | W    | 7.5  | SN     |
| 4         | PD W/D          | 74  | M   | W    | 19   |        |
| 5         | PD W/D          | 75  | F   | W    | 24   |        |

W/D, with dementia; M, Male; F, Female; W, White;  
PMD, Postmortem delays; SN, Substantia nigra



**Supplementary Table 2.** Human postmortem tissues used for Western blots in Fig 7E and F.

| Sample No. | Final Diagnosis | Age | Sex | Race | PMD | Tissue |
|------------|-----------------|-----|-----|------|-----|--------|
| 1          |                 | 73  | M   | W    | 9   |        |
| 2          |                 | 62  | M   | W    | 14  |        |
| 3          | Control         | 80  | M   | B    | 21  | Cortex |
| 4          |                 | 80  | F   | W    | 6   |        |
| 5          |                 | 79  | M   | W    | 16  |        |
| 1          | PD W/D          | 75  | M   | W    | 6   |        |
| 2          | PD              | 75  | F   | W    | 24  | Cortex |
| 3          | PD W/D          | 83  | M   | W    | 7   |        |
| 4          | PD W/D          | 85  | M   | W    | 11  |        |

W/D, with dementia; M, Male; F, Female; W, White; PMD, Postmortem delays.

**Supplementary Table 3.** Human postmortem tissues used for immunostaining in **Fig. 7G** and **H** (GFAP+TRPV1), **I** and **J** (GFAP+CNTF) and **K-O** (CNTFR $\alpha$ ).

| Sample No | Final Diagnosis | Age  | Sex | PMD  | Staining       | Tissue |
|-----------|-----------------|------|-----|------|----------------|--------|
| 10-303    |                 | 43.2 | M   | 44   |                |        |
| 08-026    |                 | 67.3 | M   | 24   | GFAP+TRPV1     |        |
| 07-787    |                 | 66.5 | M   | 19   |                |        |
| 04-112    |                 | 73.5 | M   | 22   |                |        |
| V11-038   | Control         | 39.2 | M   | 51   | GFAP+CNTF      | SN     |
| 07-239    |                 | 78.8 | M   | 19   |                |        |
| 08-260    |                 | 67.3 | F   | 24   |                |        |
| V11-038   |                 | 39.2 | M   | 51   | CNTFR $\alpha$ |        |
| 04-424    |                 | 75.1 | F   | 22.5 |                |        |
| 08-319    |                 | 70   | M   | 32.5 |                |        |
| 07-566    |                 | 78.4 | M   | 32.5 | GFAP+TRPV1     |        |
| 09-260    |                 | 66.8 | F   | 20   |                |        |
| V11-042   |                 | 72.1 | M   | 25   |                |        |
| 03-819    | PD              | 63.6 | F   | 56   | GFAP+CNTF      | SN     |
| 09-260    |                 | 66.8 | F   | 20   |                |        |
| 09-260    |                 | 66.8 | F   | 20   |                |        |
| V11-730   |                 | 80   | M   | 65   | CNTFR $\alpha$ |        |
| 07-566    |                 | 78.4 | M   | 32.5 |                |        |

M, Male; F, Female;  
PMD, Postmortem delays; SN, Substantia nigra
